# Supplementary material for: Increased Interstitial Concentrations of Glutamate and Pyruvate in Vastus Lateralis of Women with Fibromyalgia Syndrome Are Normalized after an Exercise Intervention – A Case-Control Study
Source: PubMed Central journal article supplement (PMC5047648; doi:10.1371/journal.pone.0162010), 2016-10-03

S5 Fig

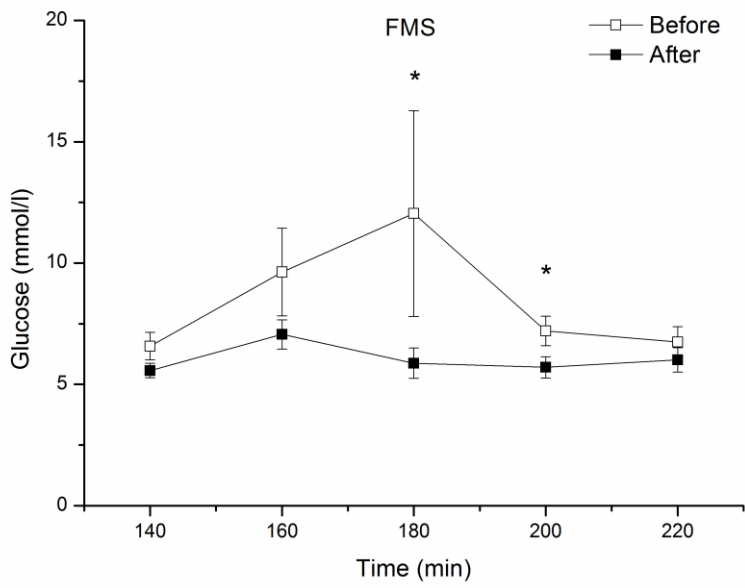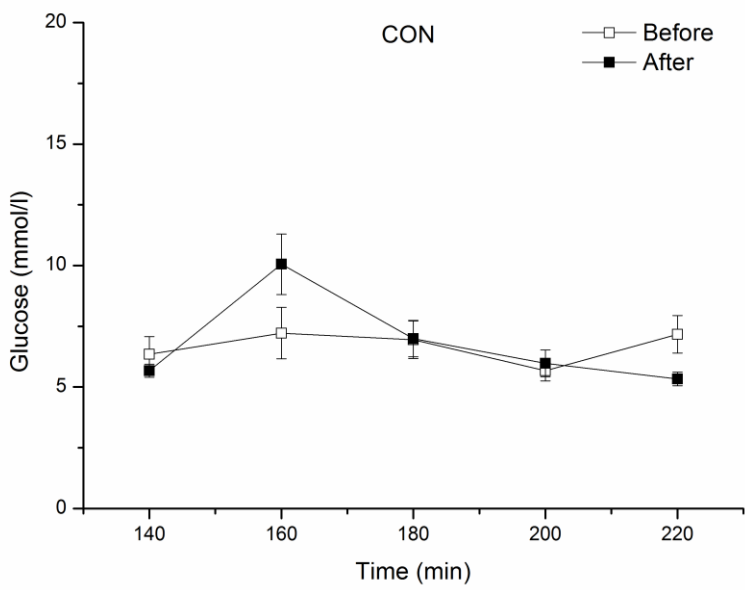

Supplement: pone.0162010.s007.pdf [file pone.0162010.s007.pdf]
